# Supplementary material for: Horizontal gene cluster transfer increased hallucinogenic mushroom diversity
Source: PubMed Central journal article supplement (PMC6121855; doi:10.1002/evl3.42), 2018-02-27

## Horizontal gene cluster transfer increased hallucinogenic mushroom diversity

### Supplementary Figure Legends:

**Figure S1.** A. Mass Chromatogram of LC-MS/MS. Multiple-Reaction-Monitoring (MRM) chromatogram of tryptophan reaction (a). MRM-chromatogram of mass-to-charge ratio ( $m/z$ ) 205  $[M+H]^+$  (peak corresponding to tryptophan mass) and its MS/MS looking for one of its daughter ions at  $m/z$  146 (b). MRM chromatogram of tryptophan+tryptophan decarboxylase (PsiD) reaction, showing additional peaks at retention time (tR) of 3.38, 4.48 and 5.09 (c). MRM-chromatogram of  $m/z$  144.1  $[M+H]^+$  (characteristic tryptamine peak mass) and its MS/MS looking for one of its daughter ions at  $m/z$  117 (d).

**Figure S2.** A-E) RAxML phylogenies of psilocybin (PS) genes with support shown out of 100 bootstraps. Terminals indicate JGI accession numbers for protein models. Clustered PS genes are indicated in blue. A. tryptophan decarboxylase (PsiD); B. N-methyltransferase (PsiM); C. hydroxylase (PsiH); D. phosphotransferase (PsiK); E. transporter (PsiT). F) Phylogeny of ferric reductase, where sequences putatively involved in a horizontal gene transfer event are indicated in red.

**Figure S3.** Gene tree-species tree reconciliation in NOTUNG. D=duplication, T=horizontal transfer, L=loss of hypothetical genes.

**Figure S4.** Schematics of the bioinformatic pipelines used to detect horizontal gene transfers (HGTs) to *Panaeolus cyanescens*, along with the number of sequences retained at each step. A) Schematic describing the pipeline for the identification of HGT from *Psilocybe cyanescens* to *Pa. cyanescens*. B) Schematic describing the pipeline for the identification of HGT from dung-associated Agaricales to *Pa. cyanescens*.

ESI pos sens W

051617\_34

1: MRM of 16 Channels ES+  
TIC  
7.81e8

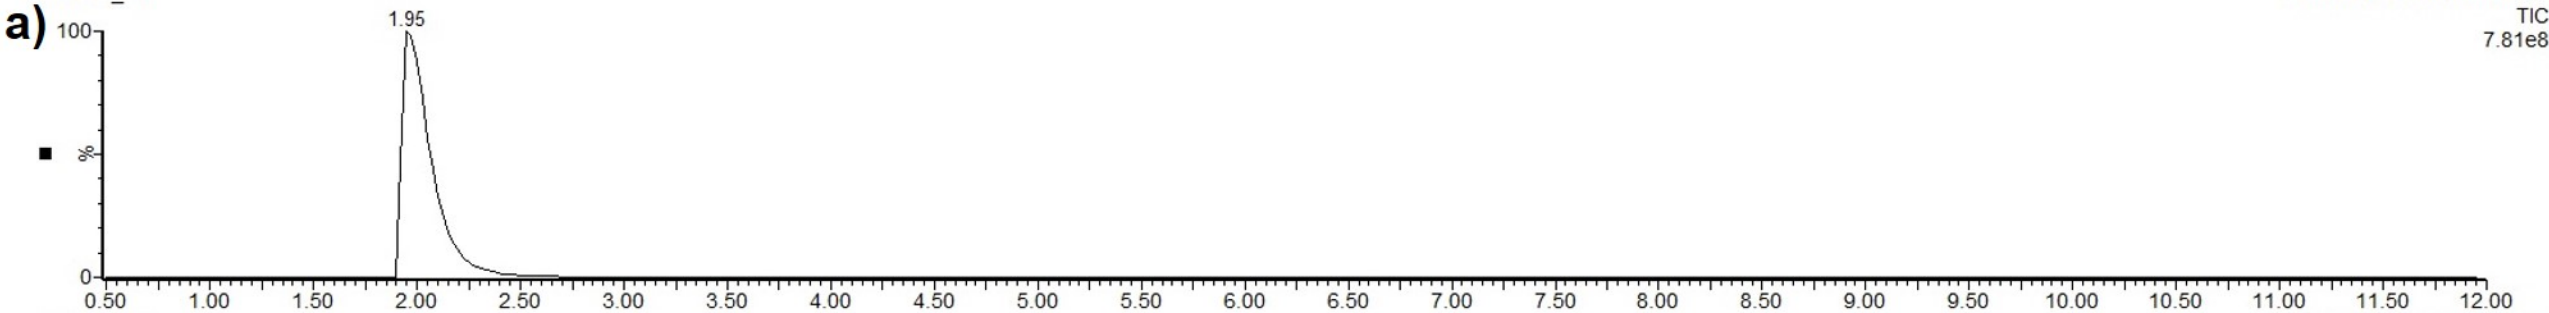

051617\_34

1: MRM of 16 Channels ES+  
205.004 > 145.959 (Tryptophan)  
1.30e8

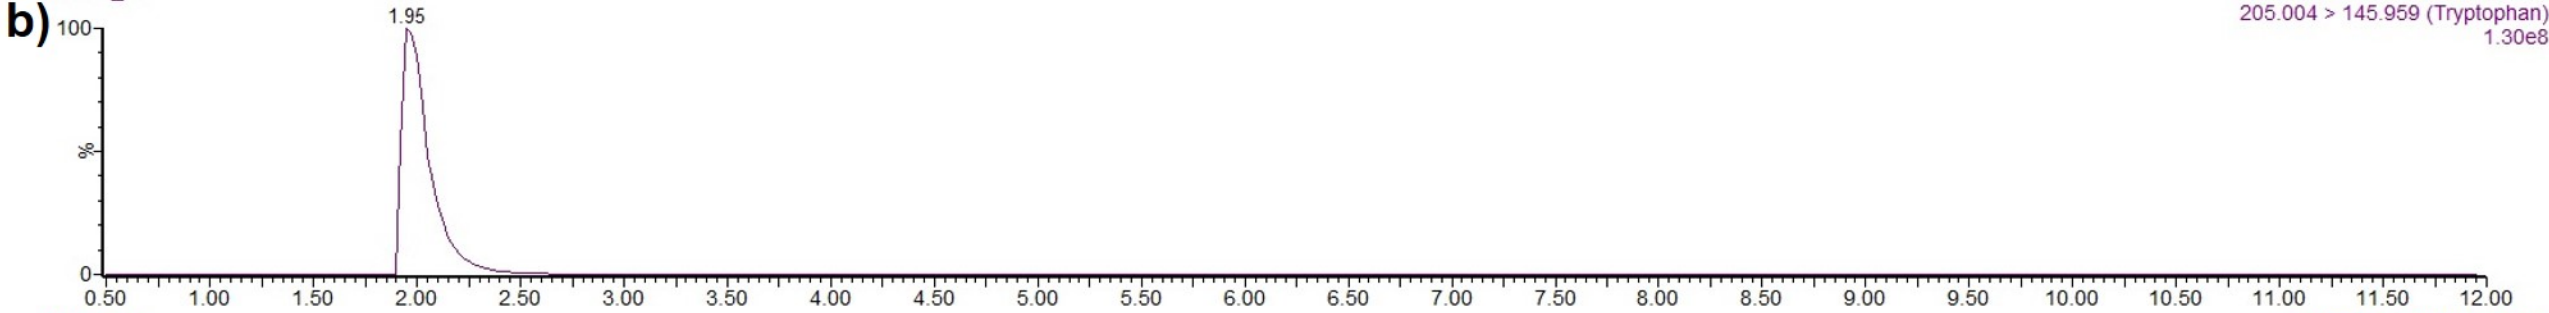

051617\_46

1: MRM of 4 Channels ES+  
TIC  
1.23e7

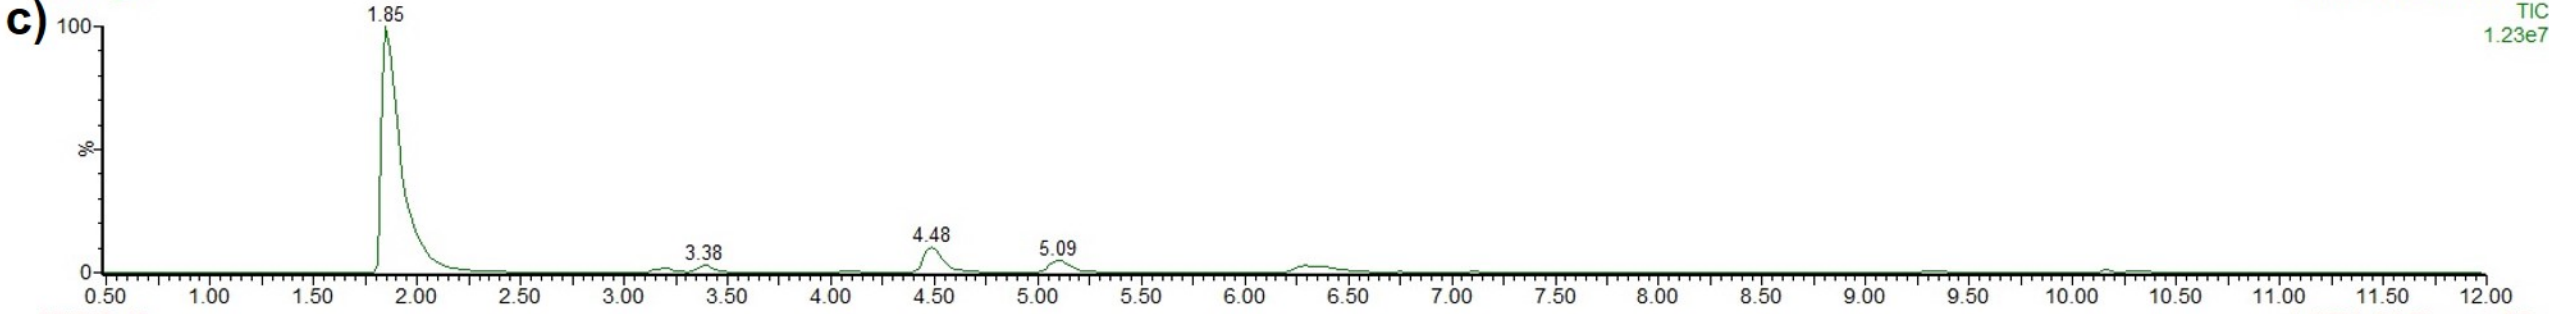

051617\_46

1: MRM of 4 Channels ES+  
144.132 > 117.065 (Tryp\_Daughter1)  
5.00e6

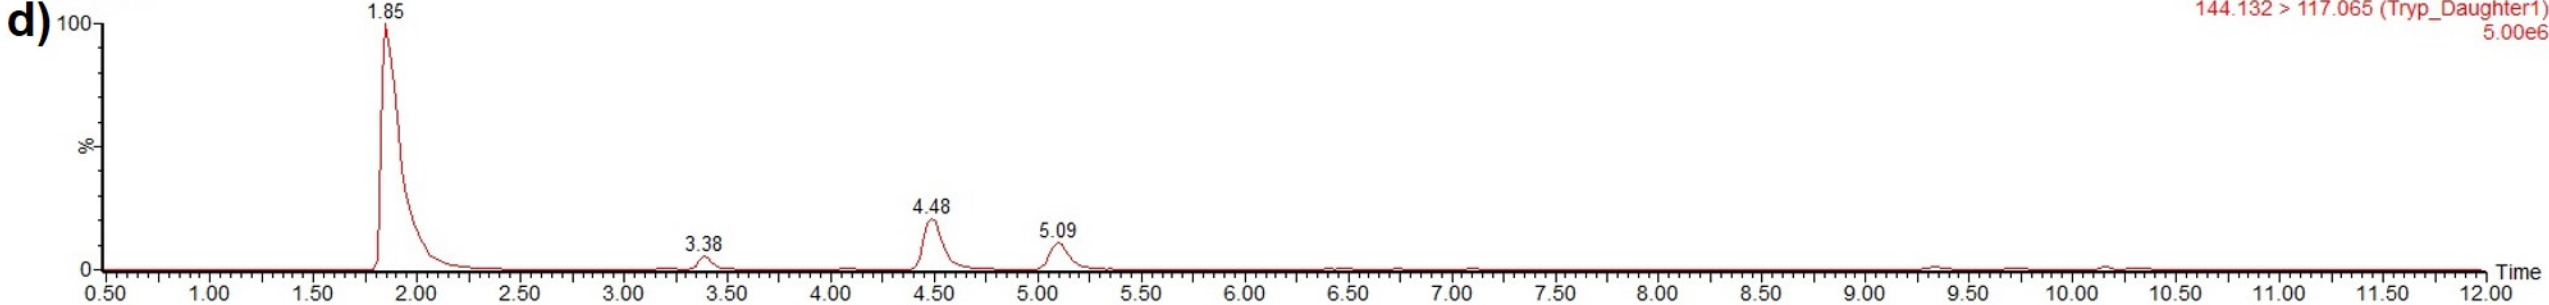

A. Tryptophan Decarboxylase (PsiD)

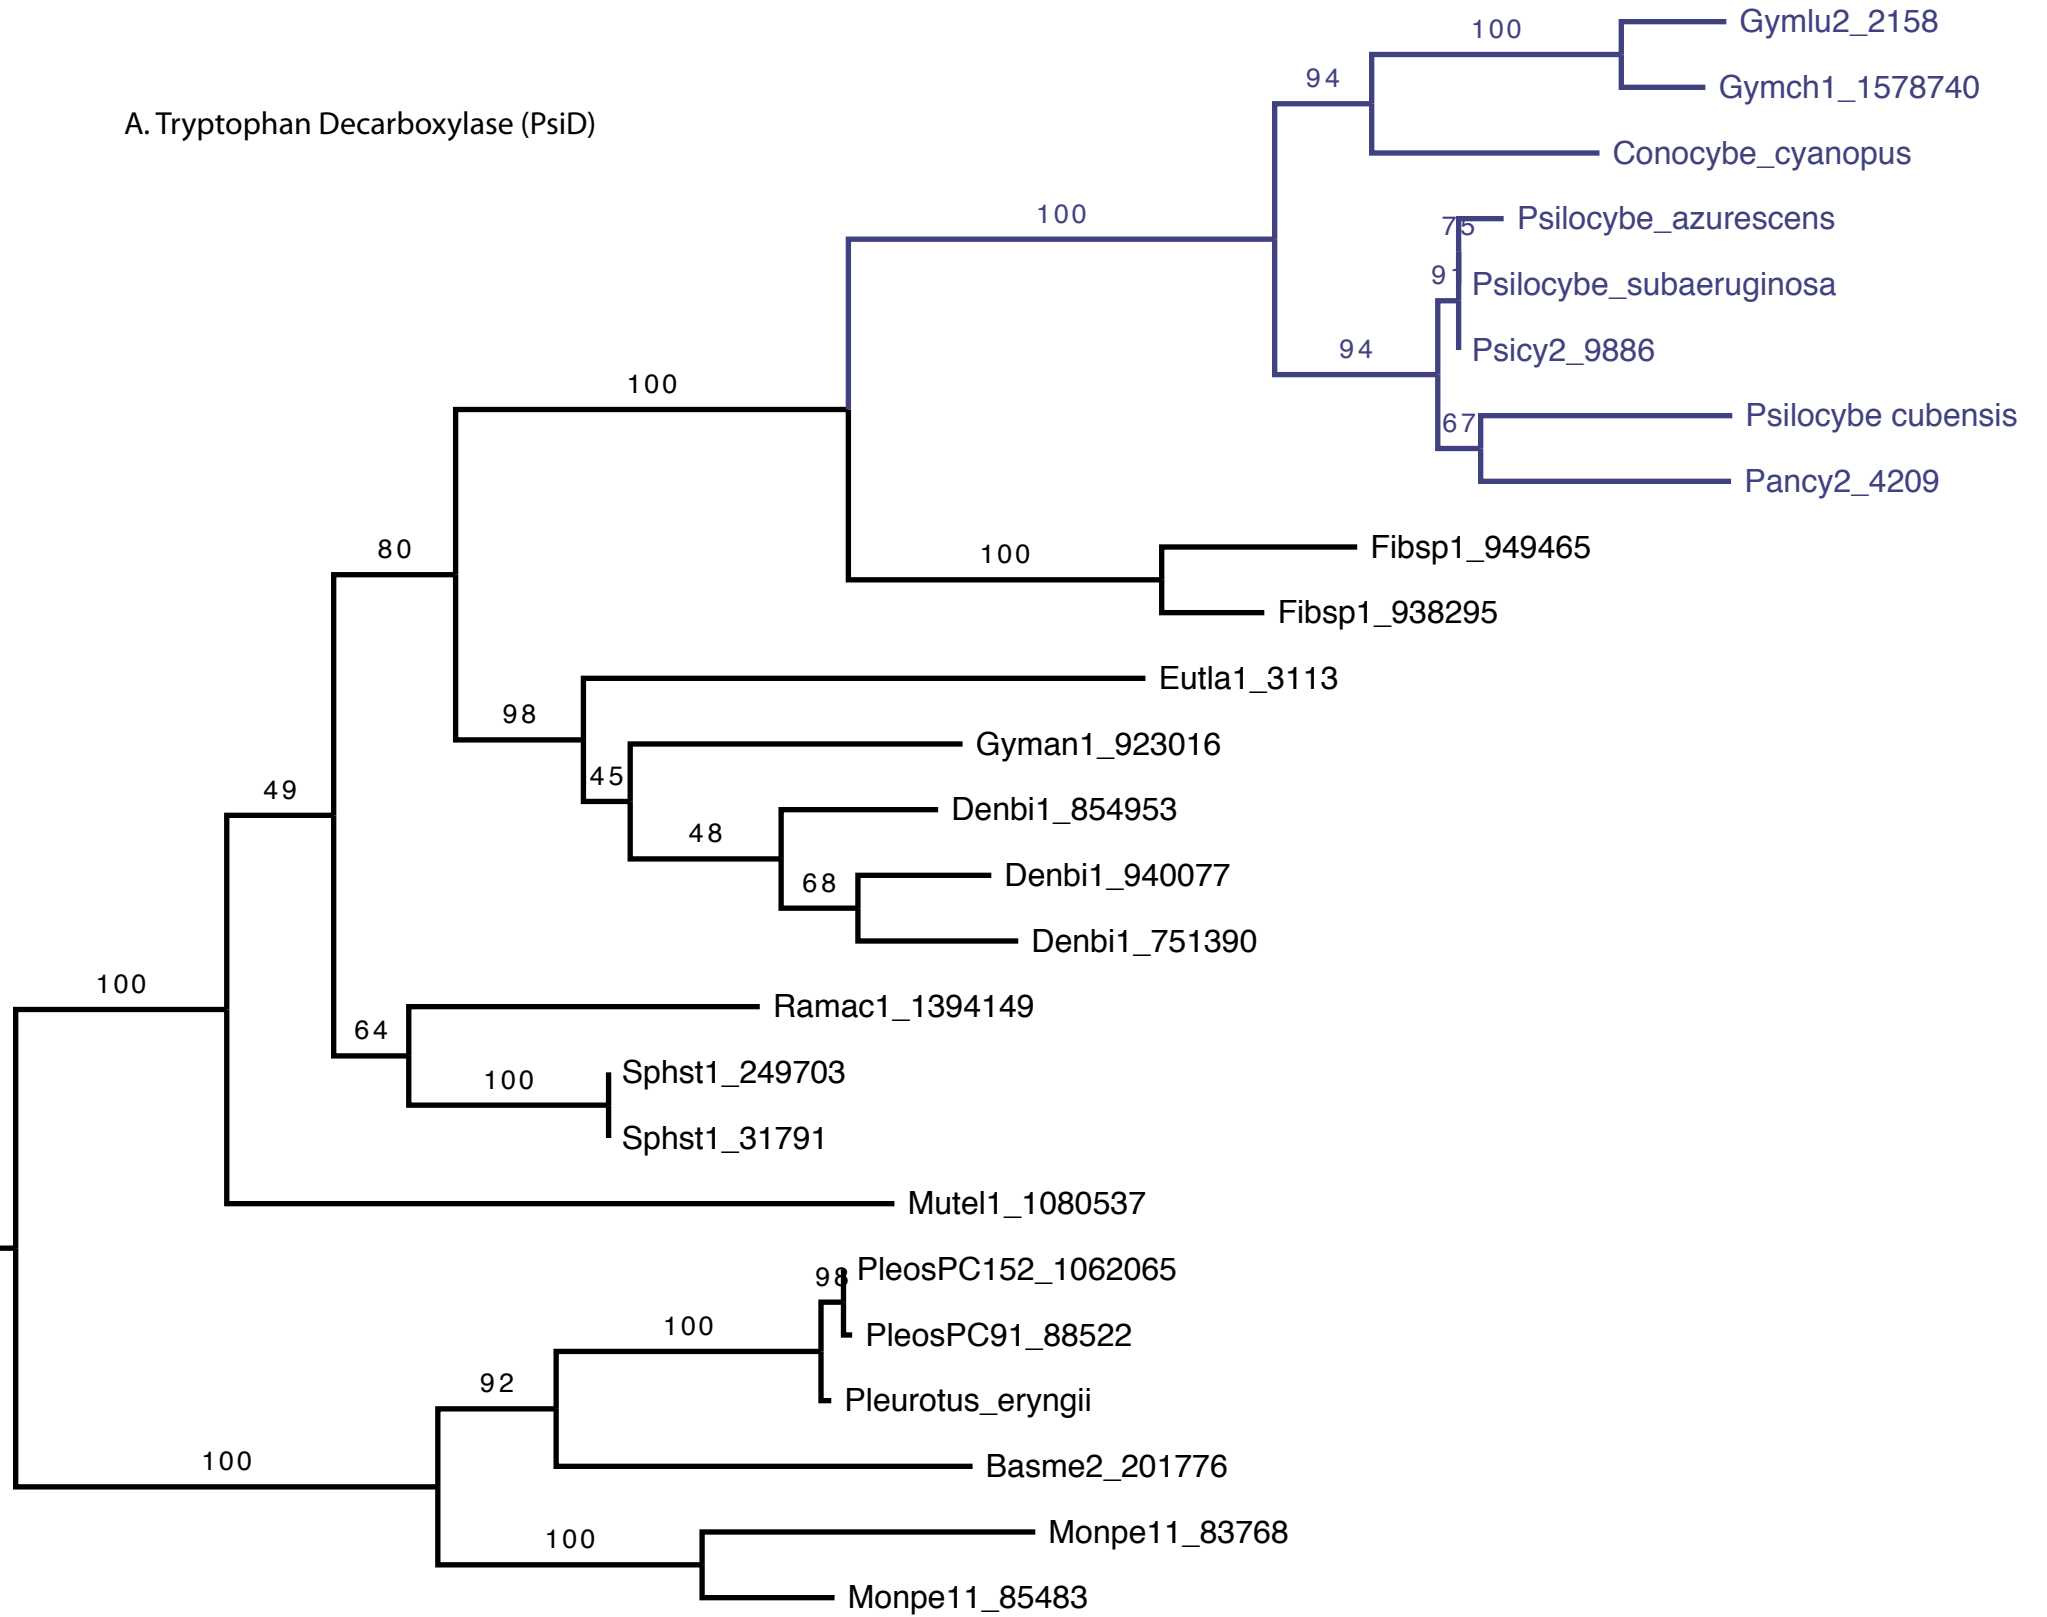

0.08

# B. N-methyltransferase (PsiM)

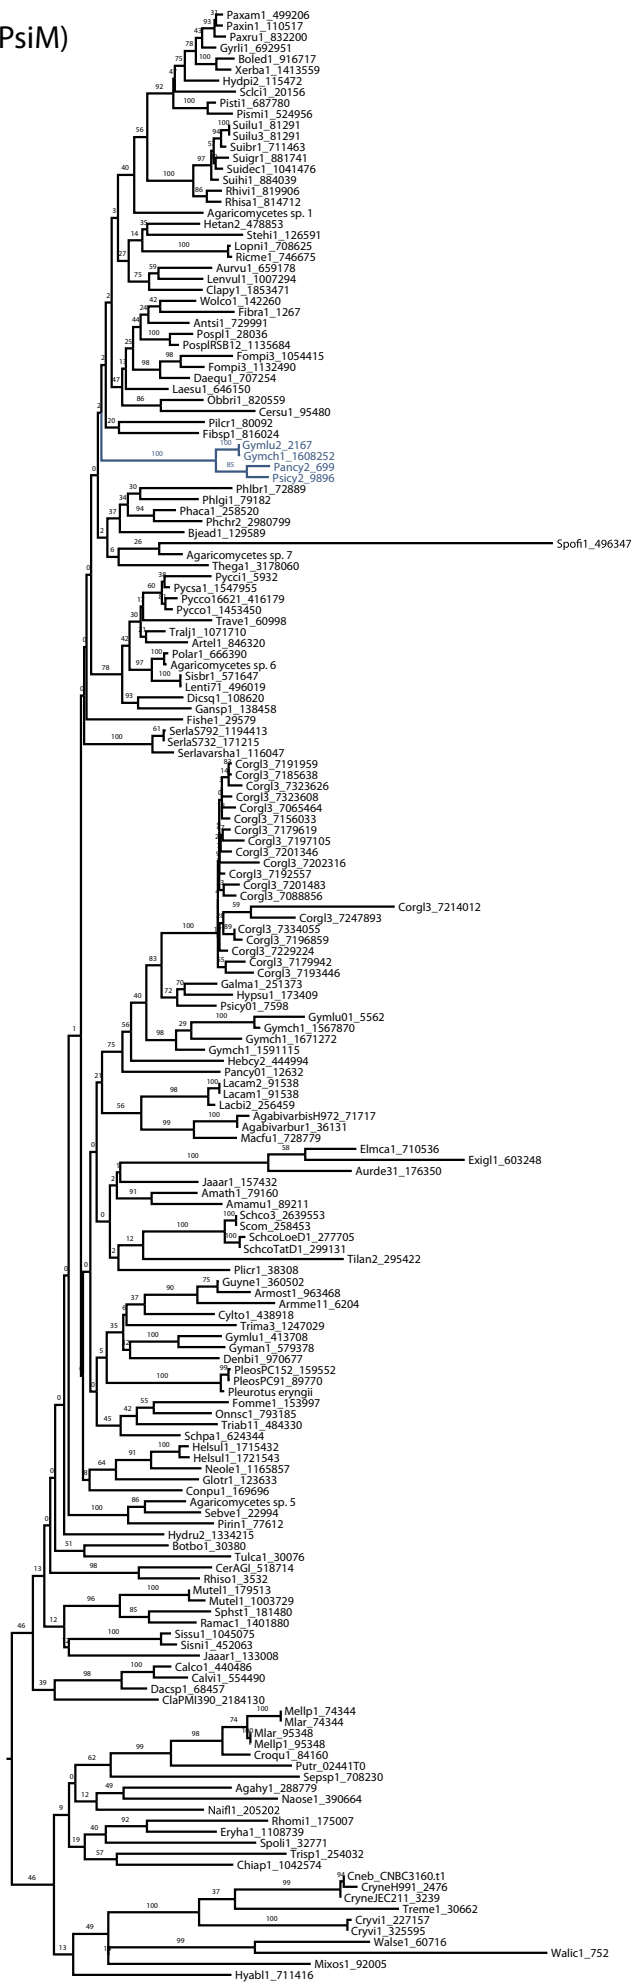

C. Hydroxylase (PsiH)

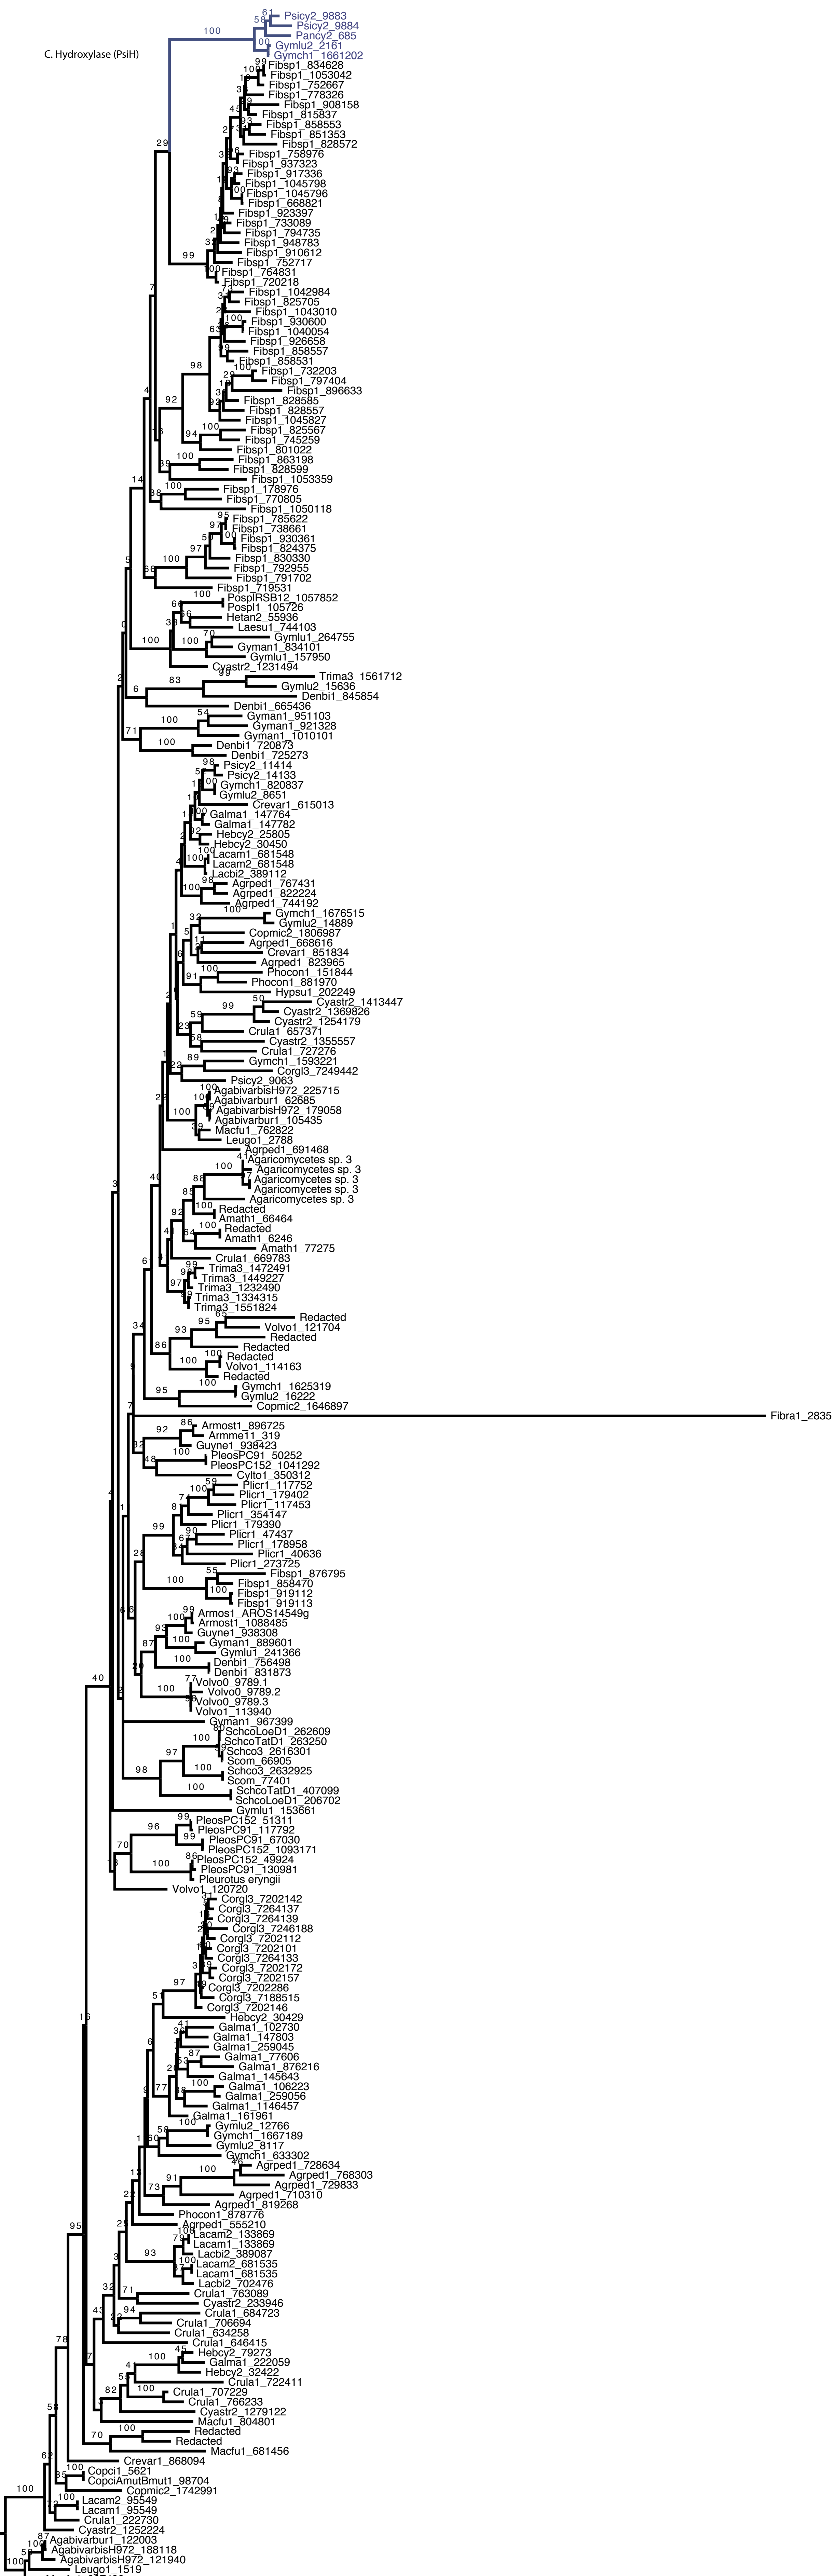

D. phosphotransferase (PsiK)

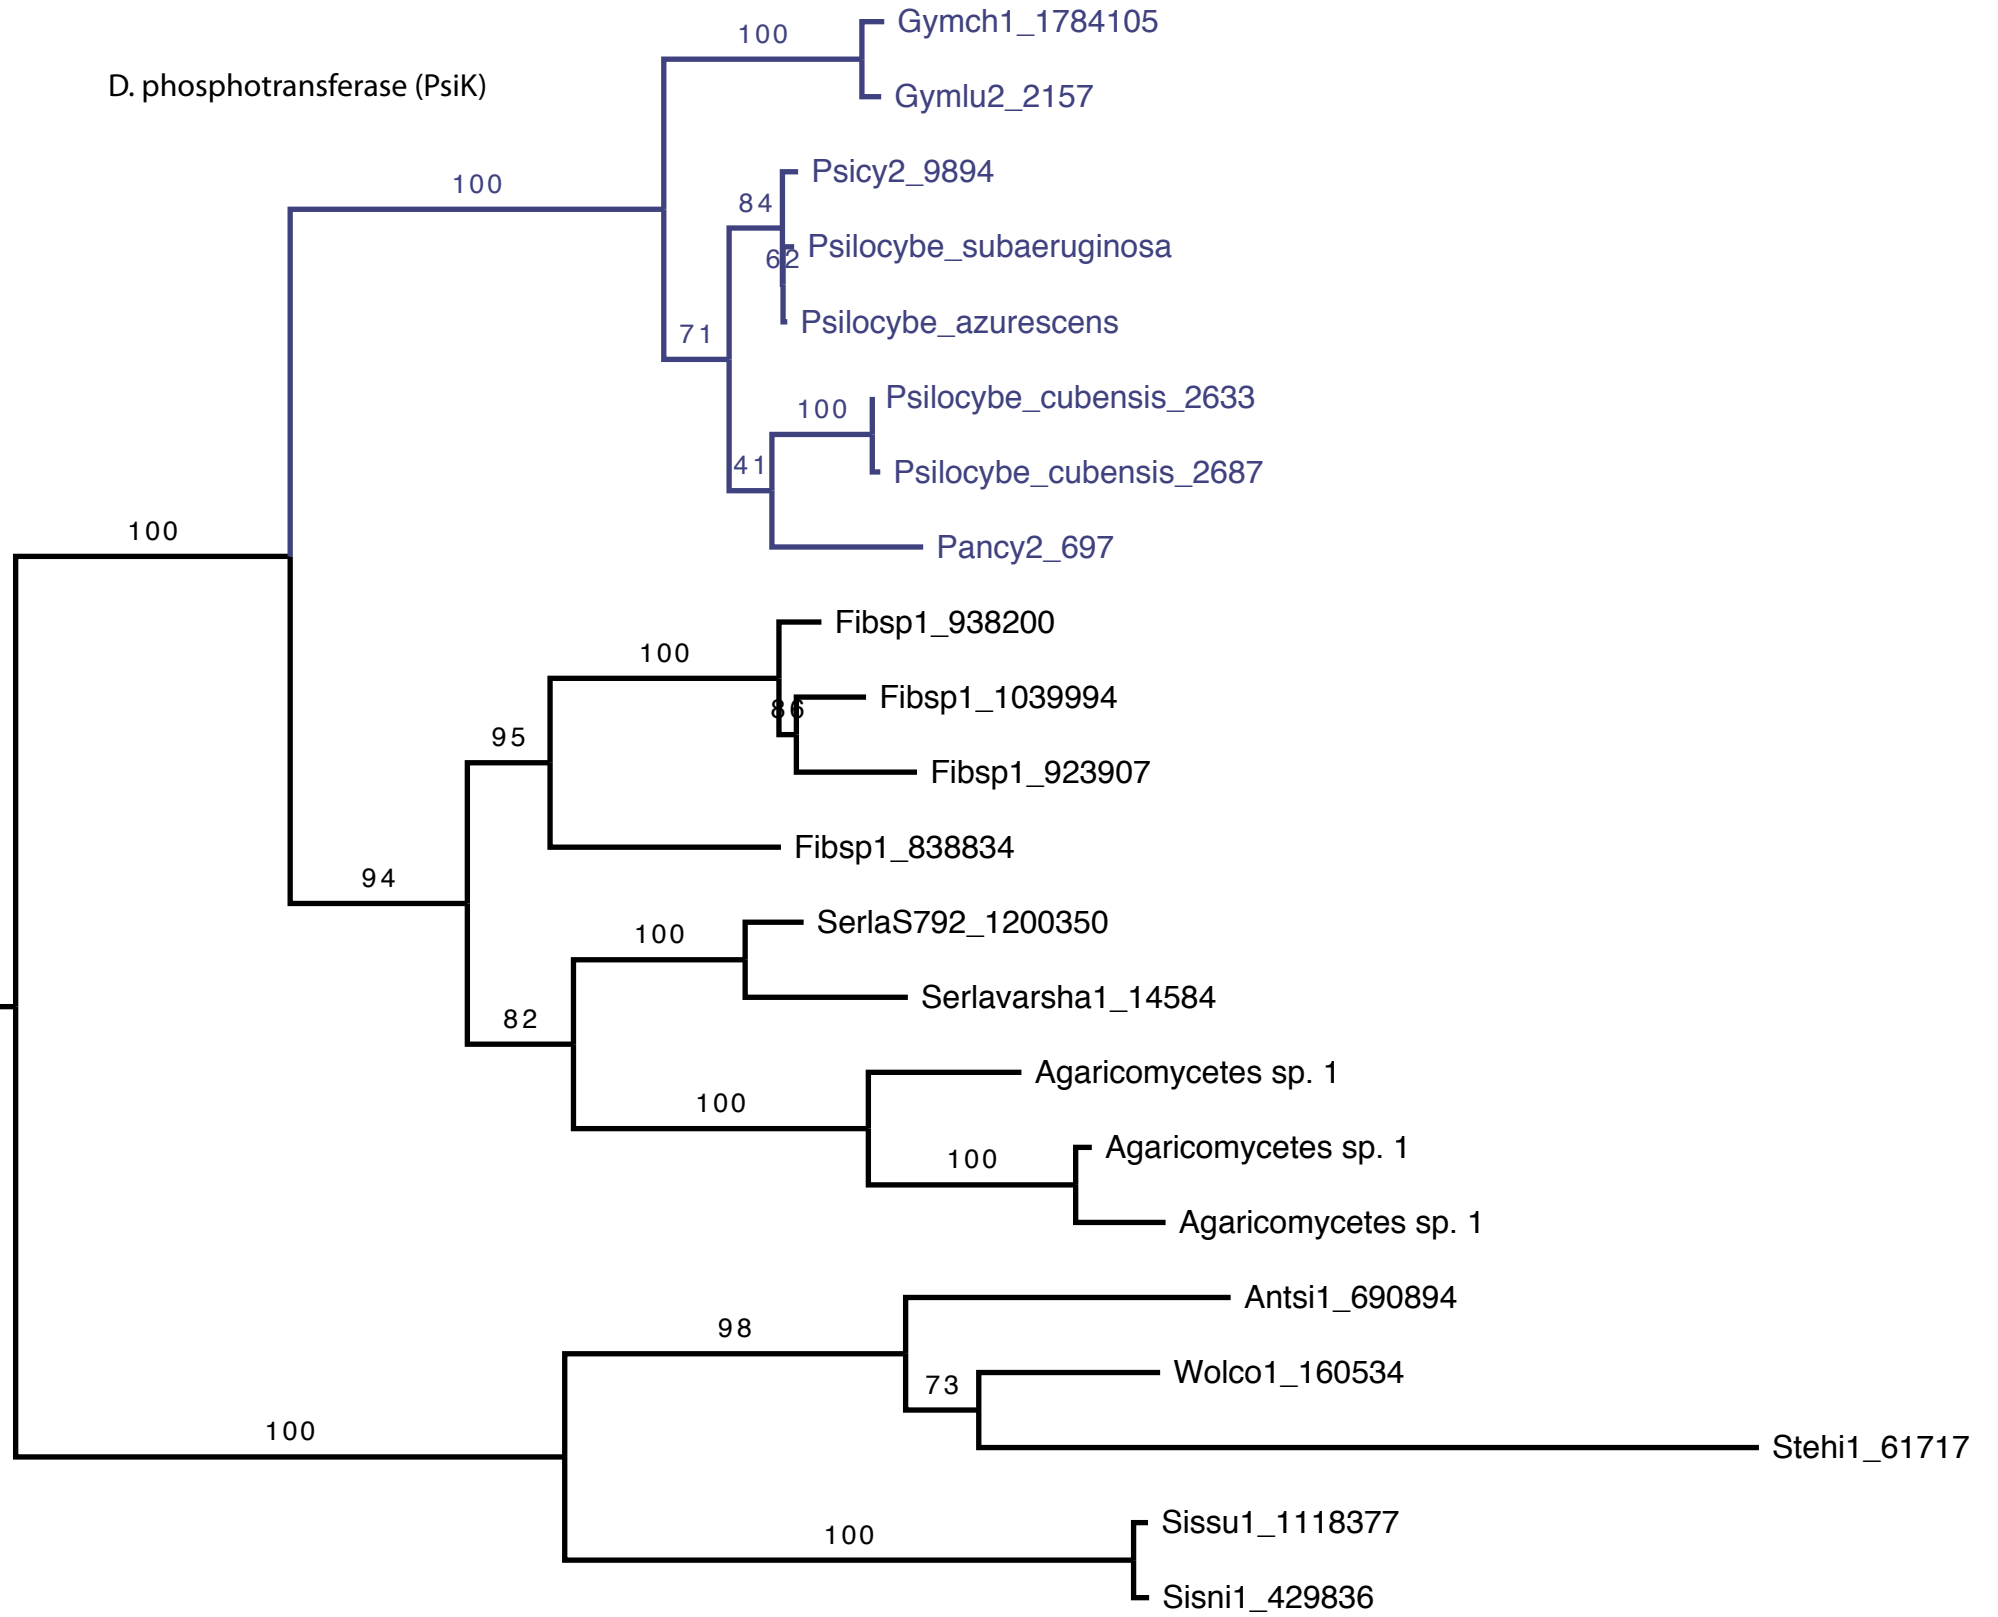

0.3

E. Transporter (PsiT)

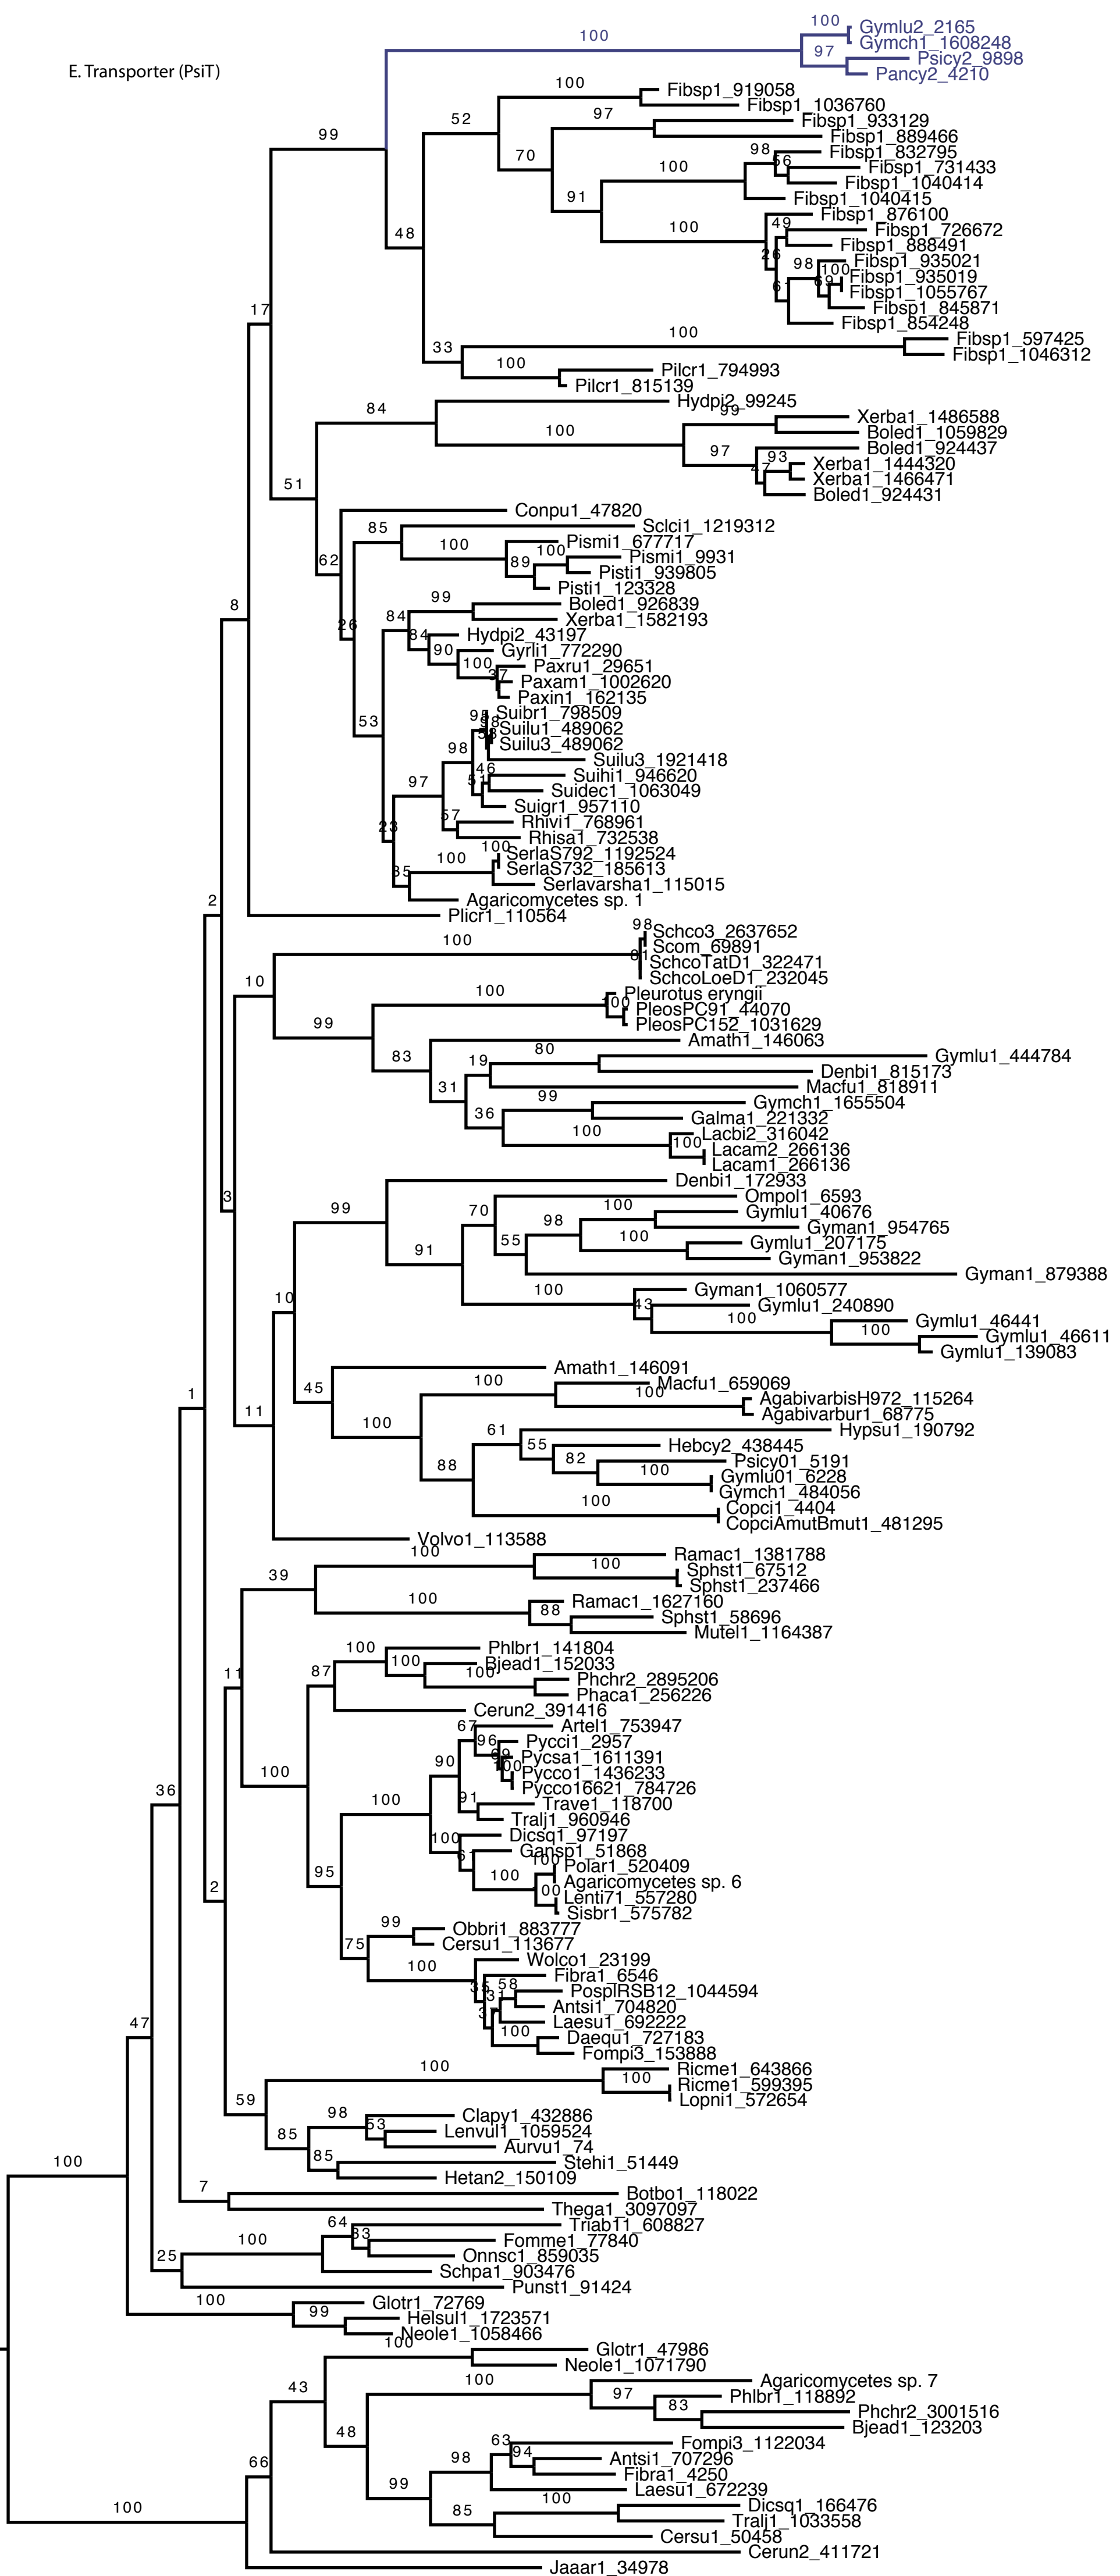

0.3

F. ferric reductase

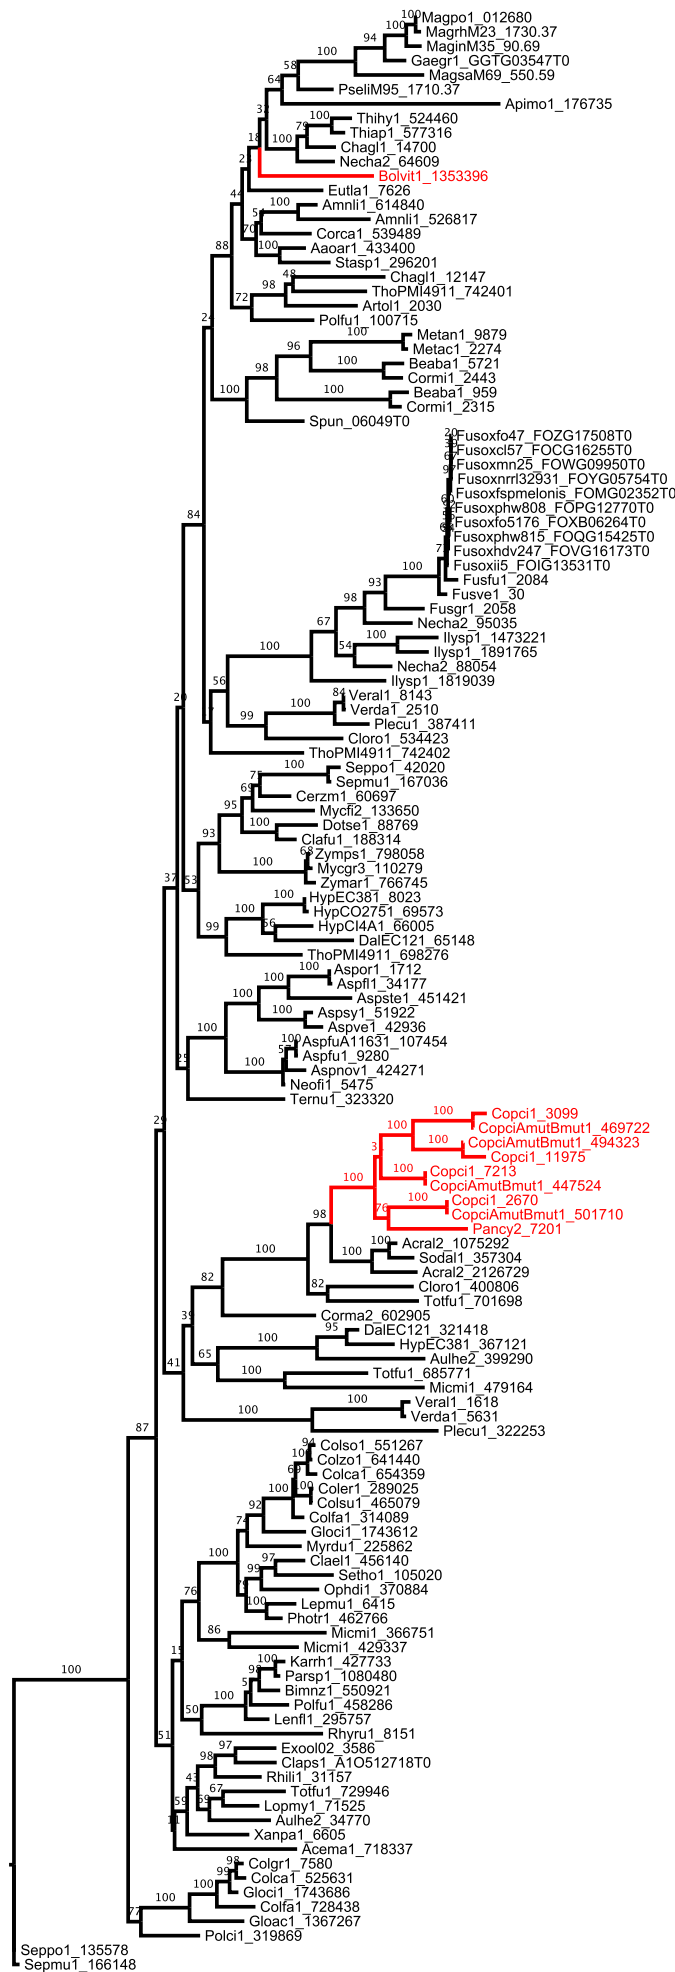



# TDC gene tree - species tree reconciliation

Species tree

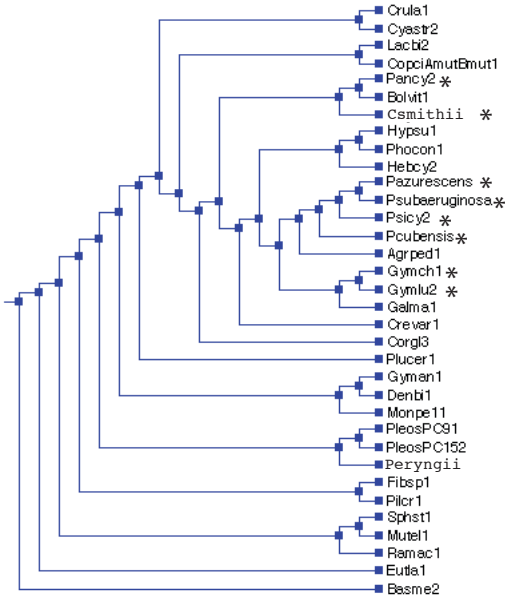

Image generated with Notung 2.9, on Apr 11, 2017

DTL model

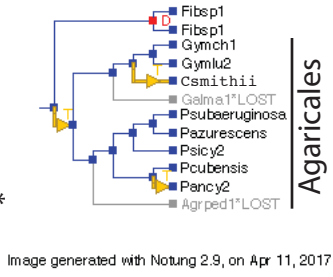

Image generated with Notung 2.9, on Apr 11, 2017

DL model

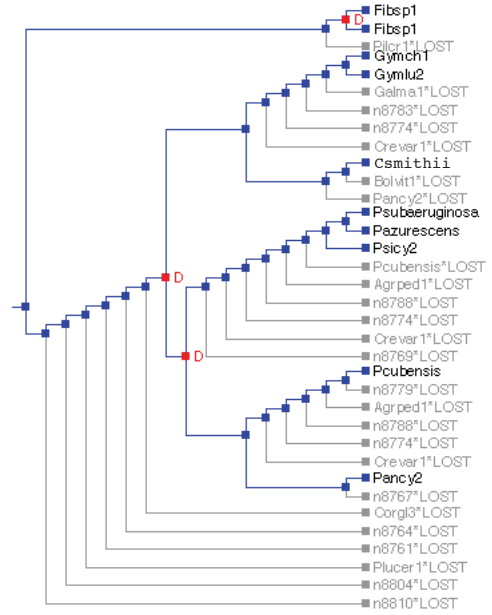

Image generated with Notung 2.9, on Apr 11, 2017

1 duplication  
3 transfers  
2 losses

|                            |
|----------------------------|
| Edge Weight Threshold: 1.0 |
| <b>Costs/Weights:</b>      |
| Duplications: 1.5          |
| Transfers: 3.0             |
| Co-Divergences: 0.0        |
| Losses: 1.0                |

3 duplications  
25 losses

|                            |
|----------------------------|
| Edge Weight Threshold: 1.0 |
| <b>Costs/Weights:</b>      |
| Duplications: 1.5          |
| Transfers: 3.0             |
| Co-Divergences: 0.0        |
| Losses: 1.0                |

Agaricales

Agaricales

## A) Detecting HGT from *Psicy2* to *Pancy2*

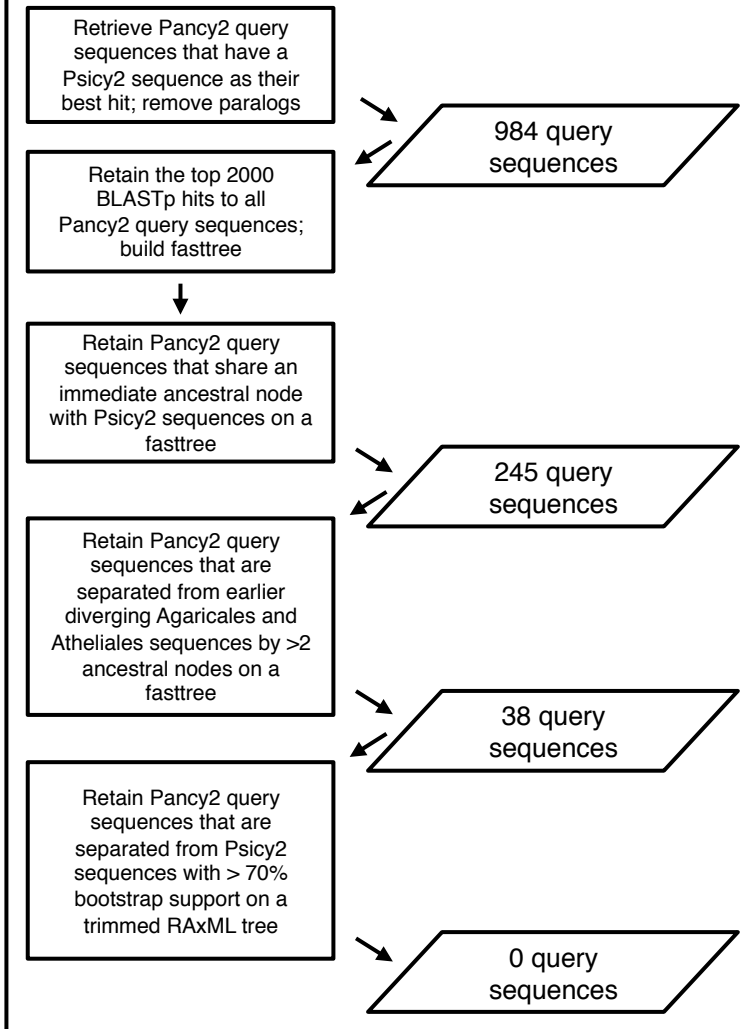

## B) Detecting HGT from *dung-associated Agaricales* to *Pancy2*

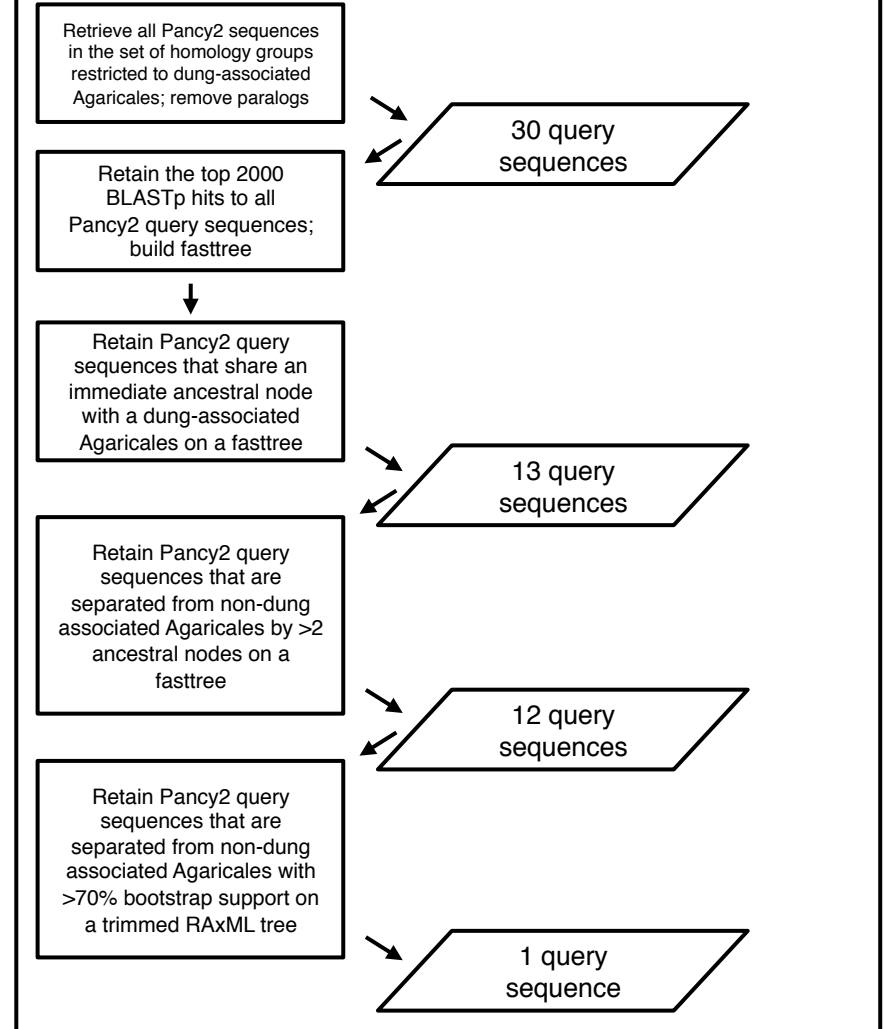

Supplement: EVL3-2-88-s001.pdf [file EVL3-2-88-s001.pdf]
